# Supplementary material for: Antigenic drift and subtype interference shape A(H3N2) epidemic dynamics in the United States
Source: eLife. 2024 Sep 25;13:RP91849. doi: 10.7554/eLife.91849 (PMC11424097; doi:10.7554/eLife.91849)
Supplement: Figure 2—source data 2. — We downloaded all N2 sequences and associated metadata from the GISAID EpiFlu database and focused our analysis on complete N2 sequences that were sampled between January 1, 1997, and October 1, 2019. To account for variation in sequence availability across global regions, we subsampled the selected sequences five times to representative sets of no more than 50 viruses per month, with preferential sampling for North America. Each month up to 25 viruses were selected from North America (when available) and up to 25 viruses were selected from nine other global regions (when available), with even sampling across the other global regions (China, Southeast Asia, West Asia, Japan and Korea, South Asia, Oceania, Europe, South America, and Africa). [file elife-91849-fig2-data2.xlsx]

## Sheet: Sheet1
Replicate	Total	North America	China	Southeast Asia	West Asia	Japan/ Korea	South Asia	Oceania	Europe	South America	Africa
0	8816	3543	5273	990	819	292	582	279	1033	473	362
1	8816	3543	5273	990	819	292	582	279	1033	473	362
2	8816	3543	5273	990	819	292	582	279	1033	473	362
3	8816	3543	5273	990	819	292	582	279	1033	473	362
4	8815	3542	5273	990	819	292	582	279	1033	473	362
